# Supplementary material for: Molecular dynamics simulation study on the growth of CO 2 hydrate from high-concentration NaCl solutions
Source: Royal Society of Chemistry journal article supplement (doi:10.1039/d5cp03116h), 2025-12-16
Supplement: d5cp03116h1.pdf [file d5cp03116h1.pdf]

Electronic Supplementary Information (8 Pages, 8 Figures, 1 Table)

**Molecular dynamics simulation study on the growth of CO<sub>2</sub> hydrate from high-concentration NaCl solutions**

Ronghui Sun,<sup>a</sup> Zhen Fan,<sup>b</sup> Xin Zheng,<sup>a</sup> Changyu Sun,<sup>a,c</sup> Shouwei Zhou,<sup>a</sup> and Qingping Li <sup>a\*</sup>

a. Beijing Huairou Laboratory, Beijing 101499, China.

b. Beijing National Laboratory for Condensed Matter Physics, Institute of Physics, Chinese Academy of Sciences, Beijing, 100190, China.

c. State Key Laboratory of Heavy Oil Processing, China University of Petroleum, Beijing 102249, China.

\* Correspondence. Email: liqingping@hrl.ac.cn

## I. Supplementary Figures

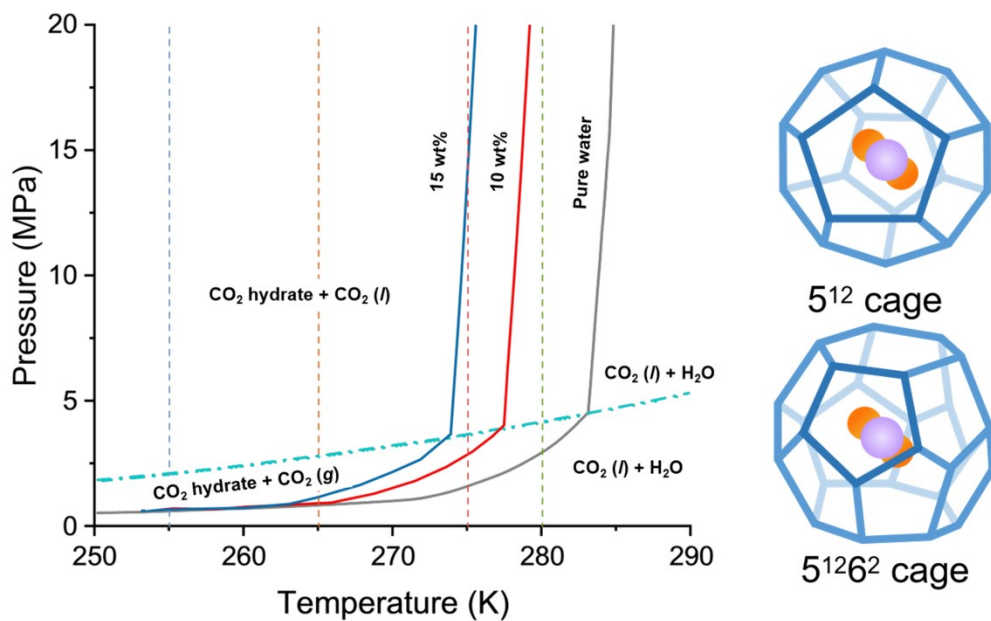

**Figure S1.** Phase diagram of the CO<sub>2</sub> – water – hydrate system at different NaCl concentrations and the structures of 5<sup>12</sup> and 5<sup>126^2</sup> cages. Simulation temperature conditions were plotted within the phase diagram (phase diagram adopted from Reference [1-3]).

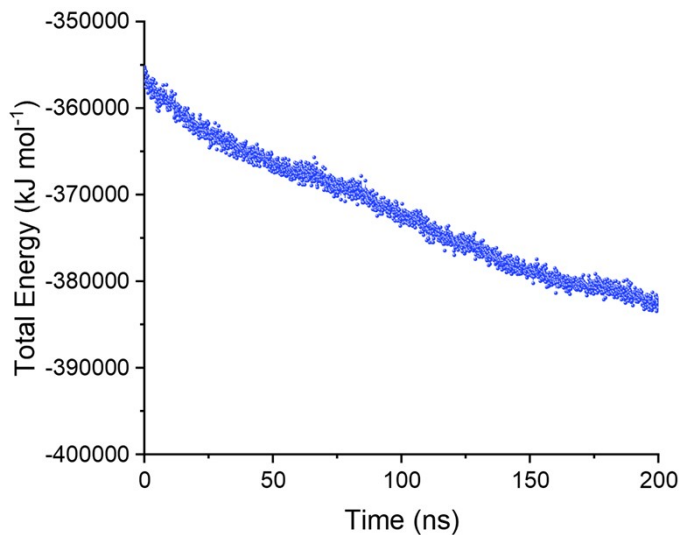

**Figure S2.** The evolution of system energy with simulation time for a typical simulation case (Case I).

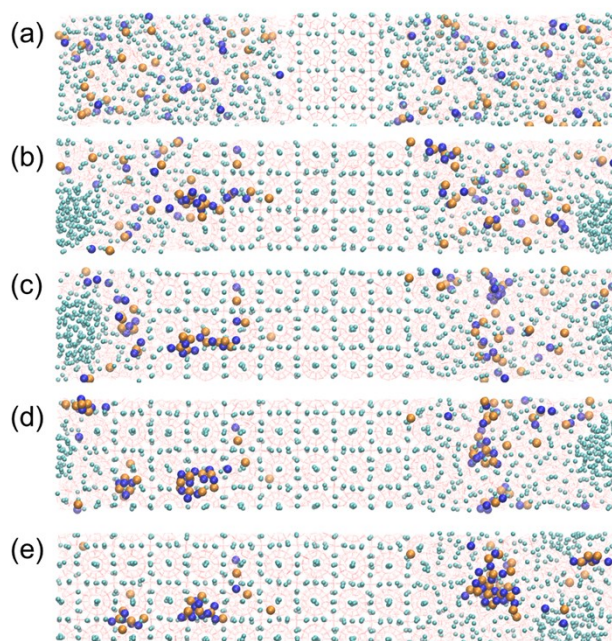

**Figure S3.** Selected configuration snapshot for simulation Case 2 ( $T = 265$  K,  $P = 50$  MPa, initial NaCl concentration of 1 mol%) at the simulation time of 0, 50, 100, 150 and 200 ns, respectively. Water molecules are shown as the hydrogen bonds in red colour; only C atoms (cyan spheres) in  $\text{CO}_2$  are presented for the ease of identification;  $\text{Na}^+$  and  $\text{Cl}^-$  ions are shown as royal blue and orange spheres, respectively.

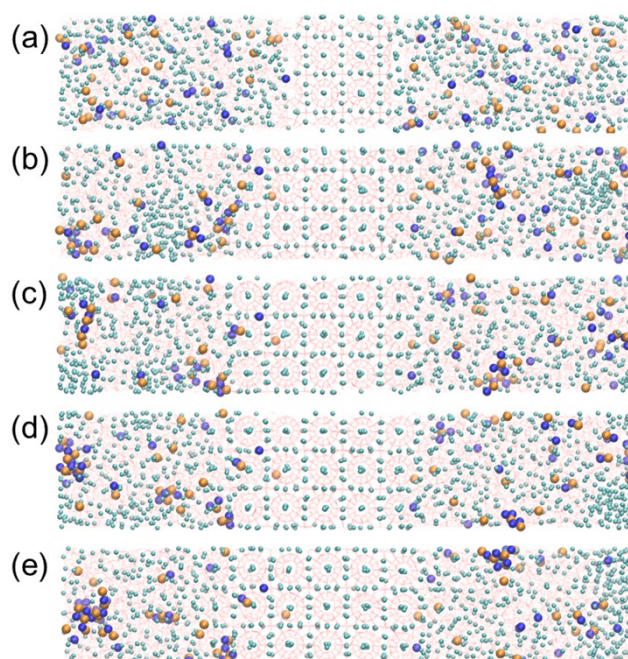

**Figure S4.** Selected configuration snapshot for simulation Case 3 ( $T = 255$  K,  $P = 50$  MPa, initial NaCl concentration of 1 mol%) at the simulation time of 0, 50, 100, 150 and 200 ns, respectively. Water molecules are shown as the hydrogen bonds in red colour; only C atoms (cyan spheres) in  $\text{CO}_2$  are presented for the ease of identification;  $\text{Na}^+$  and  $\text{Cl}^-$  ions are shown as royal blue and orange spheres, respectively.

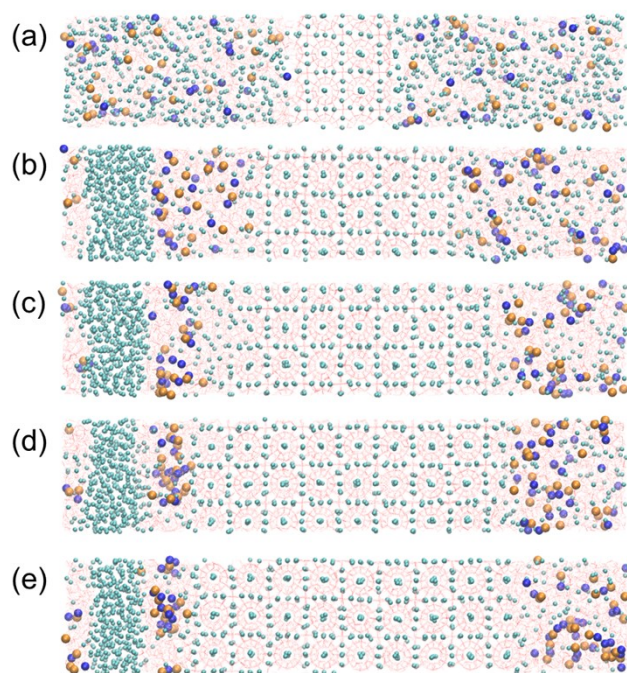

**Figure S5.** Selected configuration snapshot for simulation Case 4 ( $T = 280$  K,  $P = 50$  MPa, initial NaCl concentration of 1 mol%) at the simulation time of 0, 50, 100, 150 and 200 ns, respectively. Water molecules are shown as the hydrogen bonds in red colour; only C atoms (cyan spheres) in  $\text{CO}_2$  are presented for the ease of identification;  $\text{Na}^+$  and  $\text{Cl}^-$  ions are shown as royal blue and orange spheres, respectively.

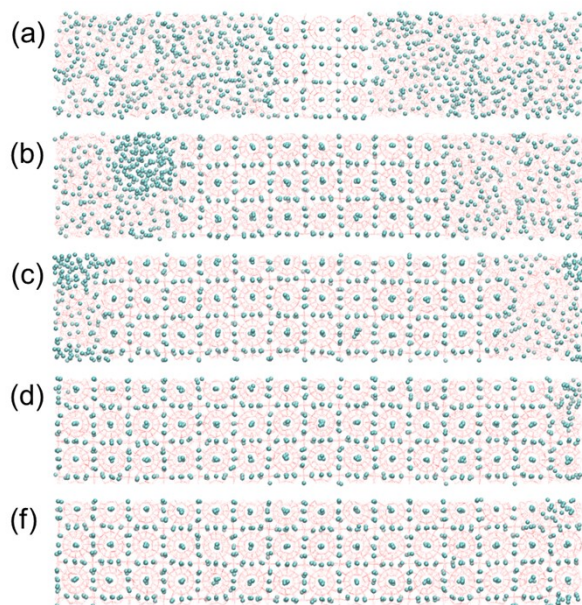

**Figure S6.** Selected configuration snapshot for simulation Case 7 ( $T = 275$  K,  $P = 50$  MPa, initial NaCl concentration of 0 mol%) at the simulation time of 0, 25, 50, 75 and 100 ns, respectively. Water molecules are shown as the hydrogen bonds in red colour; only C atoms (cyan spheres) in  $\text{CO}_2$  are presented for the ease of identification;  $\text{Na}^+$  and  $\text{Cl}^-$  ions are shown as royal blue and orange spheres, respectively.



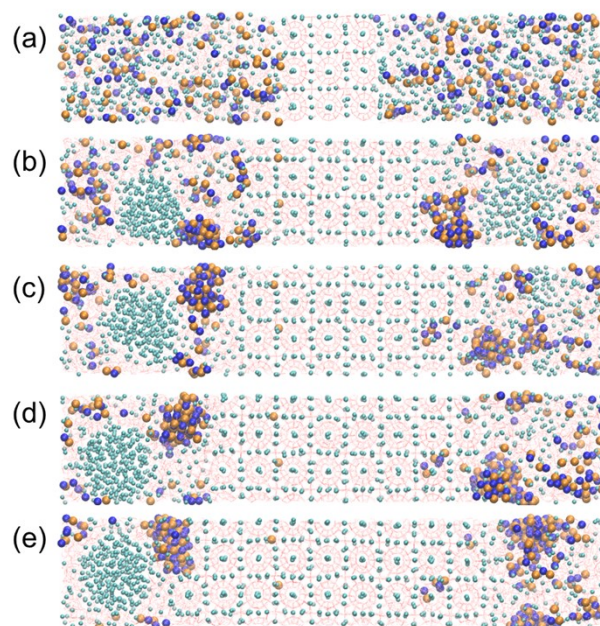

**Figure S7.** Selected configuration snapshot for simulation Case 5 ( $T = 275$  K,  $P = 50$  MPa, initial NaCl concentration of 3 mol%) at the simulation time of 0, 50, 100, 150 and 200 ns, respectively. Water molecules are shown as the hydrogen bonds in red colour; only C atoms (cyan spheres) in  $\text{CO}_2$  are presented for the ease of identification;  $\text{Na}^+$  and  $\text{Cl}^-$  ions are shown as royal blue and orange spheres, respectively.

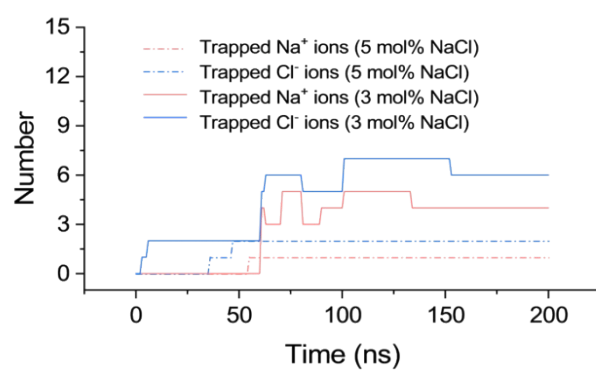

**Figure S8.** Time-dependent number of trapped Na<sup>+</sup> and Cl<sup>-</sup> ions inside the hydrate structure for simulation Cases 5 and 6 (see also Table 1).

## II. Simulation Methods

**Table S1.** Interatomic potentials employed for the simulation cases <sup>a</sup>.

| Molecule         | Site            | mass     | Q/e     | $\sigma_{ij}/(\text{\AA})$ | $\epsilon_{ij}(\text{KJ} \cdot \text{mol}^{-1})$ |
|------------------|-----------------|----------|---------|----------------------------|--------------------------------------------------|
| H <sub>2</sub> O | O               | 15.994   | 0       | 3.1668                     | 0.88217                                          |
|                  | H               | 1.008    | 0.5897  | 0                          | 0                                                |
|                  | M               | 0        | -1.1794 | 0                          | 0                                                |
| CO <sub>2</sub>  | C               | 12       | 0.70    | 2.80                       | 0.22459                                          |
|                  | O               | 15.994   | -0.35   | 3.05                       | 0.65712                                          |
| Ion              | Na <sup>+</sup> | 22.98977 | 1.000   | 3.33045                    | 0.11598                                          |
| Ion              | Cl <sup>-</sup> | 35.45300 | -1.000  | 4.41724                    | 0.492833                                         |

<sup>a</sup>.  $\epsilon_{O(\text{CO}_2)-O(\text{H}_2\text{O})} = \chi \sqrt{\epsilon_{O(\text{CO}_2)} * \epsilon_{O(\text{H}_2\text{O})}}$ ,  $\chi = 1.13$ .

TIP4P/ICE and TraPPE potential models were employed to describe the interatomic force fields of H<sub>2</sub>O and CO<sub>2</sub> molecules, respectively [4-7]. The potential parameters for Na<sup>+</sup> and Cl<sup>-</sup> ions were adopted from Reference [6]. All the cross-interaction parameters were calculated according to the Lorentz–Berthelot (LB) combining rules with the exception of the cross-interaction energy parameter between O in H<sub>2</sub>O and the O in CO<sub>2</sub> ( $\epsilon_{O(\text{CO}_2)-O(\text{H}_2\text{O})}$ ) [4,5,7]. A modification factor,  $\chi$ , was used to correct the LB cross-interaction energy parameter based on References [4,5,7]. The initial configuration was consisted of a hydrate seed (3×3×3 perfect unit cells, crystallographic information based on References [8-10]) and two adjacent aqueous NaCl solution layers with 2484 H<sub>2</sub>O molecules and 414 dissolved CO<sub>2</sub> molecules, respectively. Specific numbers of Na<sup>+</sup> cations and Cl<sup>-</sup> anions were added randomly into the aqueous layers to obtain desired NaCl concentrations listed in **Table 1**.

All MD simulations were performed using the GROMACS 2019 open-source code [11], where periodic boundary conditions, an *isothermal-isobaric* ensemble (regulated by the V-rescale thermostat with a time constant of 0.2 ps and the Berendsen with a time constant of 0.5 ps) and the time step of 1 fs were employed [7]. A cutoff distance of 1.4 nm was used to estimate the short-range non-bonded interactions with the long-range corrections applied to energy and pressure. The electrostatic interactions were calculated with particle mesh Ewald (PME) method with a cut-off radius of 1.4 nm [4,5,7]. The cage numbers were analyzed by the GRADE code based on Reference [12]. The radial pair distribution function analysis and visualization of the simulation cases were performed through the VMD software package [13].

## References:

- [1] Janicki G., Schlüter S. and Hennig T., *et al.* Simulation of Methane Recovery from Gas Hydrates Combined with Storing Carbon Dioxide as Hydrates. *J. Geol. Res.* 2011, **462156**: 1-15.
- [2] Stern L. A., Constable S. and Lu R., *et al.* Electrical Properties of Carbon Dioxide Hydrate: Implications for Monitoring CO<sub>2</sub> in the Gas Hydrate Stability Zone. *Geophys. Res. Lett.* 2021, **48**(15): e2021GL093475.
- [3] Chazallon B., Burgass R. and Chapoy A., *et al.* CO<sub>2</sub> hydrate formation in NaCl systems and undersaturated aqueous solutions. *Sci. Technol. Energy Transit.* 2023, **78**, 8.
- [4] Borrero A., Díaz-Acosta A. and Blazquez S., *et al.* Three-Phase Equilibria of CO<sub>2</sub> Hydrate from Computer Simulation in the Presence of NaCl. *Energ. Fuel.* 2025, **39**(11): 5522-5533.
- [5] Costandy, J., Michalis, V. K., Tsimpanogiannis, I. N., Stubos, A. K. and Economou, I. G. The role of intermolecular interactions in the prediction of the phase equilibria of carbon dioxide hydrates. *J. Chem. Phys.* 2015, **143**(9): 094506.
- [6] Jing X. W., Luo Q. and Cui X. F., *et al.* Molecular dynamics simulation of CO<sub>2</sub> hydrate growth in salt water. *J. Mol. Liq.* 2022, **366**: 120237.
- [7] He Z. J., Linga P. and Jiang J. W. What are the key factors governing the nucleation of CO<sub>2</sub> hydrate? *Phys. Chem. Chem. Phys.* 2017, **19**(24): 15657-15661.
- [8] Gutt C., Asmussen B., Press W., Johnson M. R., Handa Y. P. and Tse, J. S. The structure of deuterated methane-hydrate. *J Chem. Phys.* 2000, **113**(11), 4713-4721.
- [9] Kirchner M. T., Boese R., Billups W. E. and Norman L. R. Gas hydrate single-crystal structure analyses. *J Am. Chem. Soc.* 2004, **126**(30), 9407-9412.
- [10] Takeya S., Kida M., Minami H., Sakagami H., Hachikubo A., Takahashi N., Shoji H., Soloviev V., Wallmann K., Biebow N., Obzhairov A., Salomatin A. and Poort J. Structure and thermal expansion of natural gas clathrate hydrates. *Chem. Eng. Sci.* 2006, **61**(8): 2670-2674.
- [11] Hess B., Kutzner C., Van Der Spoel D. and Lindahl, E. GROMACS 4: algorithms for highly efficient, load-balanced, and scalable molecular simulation. *J. Chem. Theory Comput.* 2008, **4**(3), 435-447.
- [12] Mahmoudinobar, F. and Dias, C. L. GRADE: A code to determine clathrate hydrate structures. *Comp. Phys. Commun.* 2019, **244**: 385-391.
- [13] Humphrey, W., Dalke, A. and Schulten, K. VMD: visual molecular dynamics. *J. Mol. Graph.* 1996, **14**(1): 33-38.
